# Supplementary material for: Spinal cord perfusion pressure correlates with breathing function in patients with acute, cervical traumatic spinal cord injuries: an observational study
Source: Springer Nature journal article supplement (doi:10.1186/s13054-023-04643-y), 2023-09-20
Supplement: MOESM6 [file 13054_2023_4643_MOESM6_ESM.pdf]

**ADDITIONAL FILE 6 – Individual patient correlations of breathing function vs. SCPP**

| MEASURE OF BREATHING FUNCTION           | NO. OF PATIENTS | CORRELATION vs. SCPP  |                                  |     |      |      |
|-----------------------------------------|-----------------|-----------------------|----------------------------------|-----|------|------|
|                                         |                 | ALL PATIENTS COMBINED | INDIVIDUAL PATIENTS (% PATIENTS) |     |      |      |
|                                         |                 |                       | ↑                                | ↓   | ∩    | →    |
| EDI-peak                                | 7               | ↑                     | 71.4                             |     |      | 28.6 |
| EDI-min                                 | 7               | ↑                     | 71.4                             |     |      | 28.6 |
| Diaphragm excursion (quiet)             | 11              | →                     | 27.3                             |     |      | 72.7 |
| Diaphragm excursion (deep)              | 11              | ∩                     | 27.3                             |     | 63.6 | 9.1  |
| Diaphragm thickness (% change quiet)    | 11              | ∩                     | 9.1                              |     | 81.9 | 9.1  |
| Diaphragm thickness (% change deep)     | 11              | ∩                     | 27.3                             |     | 72.7 |      |
| Upper intercostal thickness (% change)  | 11              | ∩                     |                                  |     | 81.8 | 18.2 |
| Middle intercostal thickness (% change) | 11              | ∩                     | 9.1                              | 9.1 | 72.7 | 9.1  |
| Lower intercostal thickness (% change)  | 10              | ↑                     | 40.0                             |     | 60.0 |      |
