# Supplementary material for: Spinal cord perfusion pressure correlates with breathing function in patients with acute, cervical traumatic spinal cord injuries: an observational study
Source: Springer Nature journal article supplement (doi:10.1186/s13054-023-04643-y), 2023-09-20
Supplement: MOESM7 [file 13054_2023_4643_MOESM7_ESM.pdf]

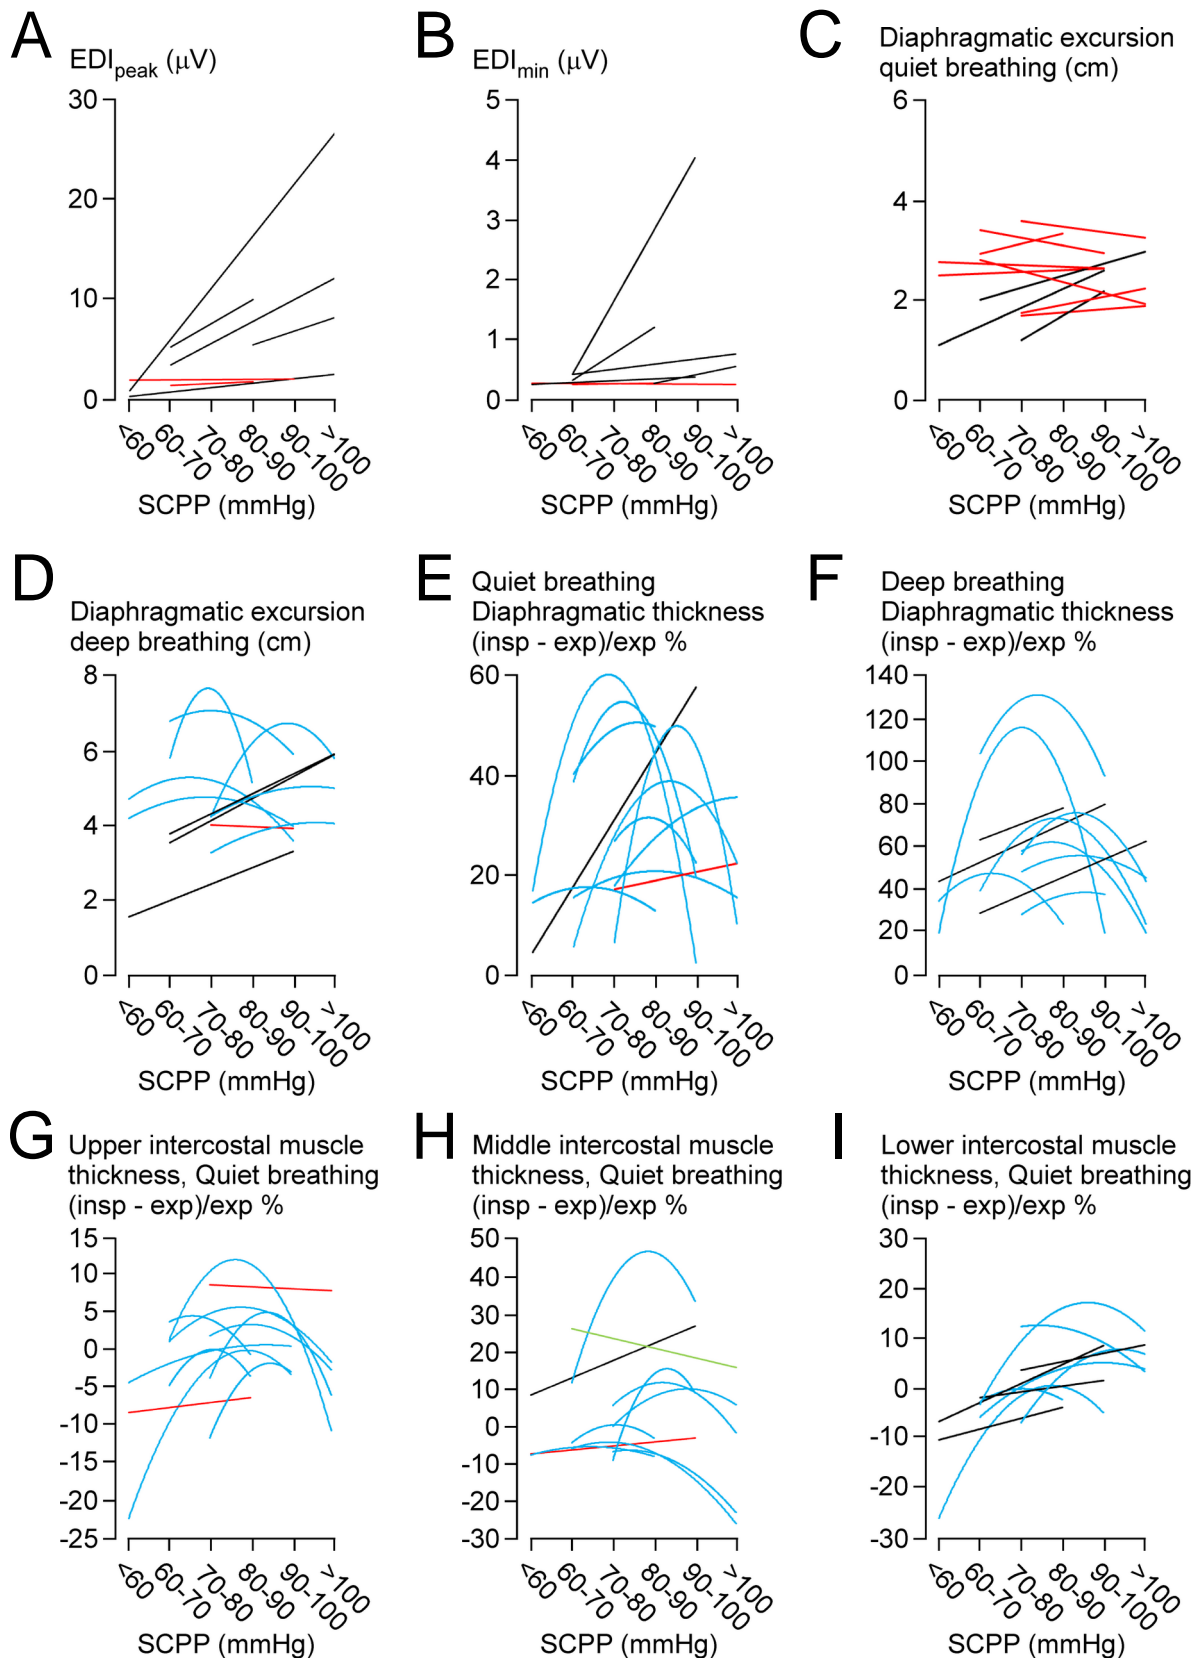

**ADDITIONAL FILE 7. Individual patient correlations of breathing function vs. SCPP. A.**  $EDI_{peak}$  **B.**  $EDI_{min}$ . Diaphragmatic excursion (cm) during **C.** Quiet breathing, and **D.** Deep breathing. Change in diaphragmatic thickness (inspiration - expiration)/expiration % during **E.** Quiet breathing, and **F.** Deep breathing. Change in muscle thickness (inspiration - expiration)/expiration % during quiet breathing for **G.** Upper intercostal, **H.** Middle intercostal, and **I.** Lower intercostal. Best-fit linear with positive correlation (black), no correlation (red), and negative correlation (green). Best fit quadratic (blue).
