# Supplementary material for: Spinal cord perfusion pressure correlates with breathing function in patients with acute, cervical traumatic spinal cord injuries: an observational study
Source: Springer Nature journal article supplement (doi:10.1186/s13054-023-04643-y), 2023-09-20
Supplement: MOESM8 [file 13054_2023_4643_MOESM8_ESM.pdf]

### ADDITIONAL FILE 8. Sample sizes

FIG. 2. Sample sizes.

|          | 2B black | 2C black | 2B blue | 2C blue |
|----------|----------|----------|---------|---------|
| <60      | 8        | 6        | 5       | 5       |
| 60 – 70  | 31       | 30       | 8       | 8       |
| 70 – 80  | 54       | 52       | 26      | 25      |
| 80 – 90  | 55       | 53       | 22      | 23      |
| 90 – 100 | 37       | 34       | 3       | 3       |
| >100     | 6        | 5        |         |         |

FIG. 3. Sample sizes.

|          | 3C black | 3D black | 3C blue | 3D blue |
|----------|----------|----------|---------|---------|
| <60      | 8        | 7        | 4       | 4       |
| 60 – 70  | 22       | 22       | 8       | 6       |
| 70 – 80  | 43       | 48       | 28      | 26      |
| 80 – 90  | 71       | 68       | 43      | 41      |
| 90 – 100 | 31       | 32       | 5       | 16      |
| >100     | 11       | 12       | 9       | 8       |
| Control  | 19       | 20       |         |         |

FIG. 4. Sample sizes.

|          | 4C black | 4D black | 4C blue | 4D blue |
|----------|----------|----------|---------|---------|
| <60      | 6        | 6        | 2       | 4       |
| 60 – 70  | 14       | 13       | 4       | 8       |
| 70 – 80  | 33       | 33       | 15      | 28      |
| 80 – 90  | 52       | 52       | 26      | 43      |
| 90 – 100 | 20       | 20       | 5       | 16      |
| >100     | 9        | 8        | 9       | 8       |
| Control  | 19       | 20       |         |         |

FIG. 5. Sample sizes.

|          | 5C black | 5D black | 5E black | 5C blue | 5D blue | 5E blue |
|----------|----------|----------|----------|---------|---------|---------|
| <60      | 8        | 8        | 8        | 4       | 4       | 4       |
| 60 – 70  | 24       | 24       | 24       | 6       | 8       | 8       |
| 70 – 80  | 50       | 50       | 48       | 26      | 28      | 28      |
| 80 – 90  | 80       | 80       | 74       | 41      | 44      | 44      |
| 90 – 100 | 36       | 36       | 28       | 16      | 18      | 18      |
| >100     | 12       | 12       | 12       | 8       | 8       | 8       |
| Control  | 20       | 19       | 8        |         |         |         |

ADDITIONAL FILE 2. Sample sizes.

|          | p <sub>set</sub> O <sub>2</sub> | Glucose | LPR |
|----------|---------------------------------|---------|-----|
| <60      | 28                              | 19      | 24  |
| 60 – 70  | 119                             | 148     | 169 |
| 70 – 80  | 283                             | 429     | 424 |
| 80 – 90  | 276                             | 437     | 413 |
| 90 – 100 | 125                             | 156     | 175 |
| >100     | 16                              | 29      | 25  |

ADDITIONAL FILE 7. Correlation  $r^2$

| A    | B    | C    | D    | E    | F    | G    | H    | I    |
|------|------|------|------|------|------|------|------|------|
| 0.02 | 0.09 | 0.01 | 0.00 | 0.07 | 0.63 | 0.05 | 0.62 | 0.58 |
| 0.03 | 0.17 | 0.02 | 0.33 | 0.41 | 0.63 | 0.26 | 0.10 | 0.54 |
| 0.33 | 0.37 | 0.02 | 0.37 | 0.46 | 0.74 | 0.39 | 0.40 | 0.31 |
| 0.79 | 0.77 | 0.05 | 0.40 | 0.61 | 0.76 | 0.66 | 1.00 | 0.32 |
| 0.85 | 0.90 | 0.07 | 0.80 | 0.70 | 0.92 | 0.88 | 1.00 | 0.37 |
| 0.89 | 0.99 | 0.07 | 0.89 | 0.88 | 0.95 | 0.88 | 0.72 | 1.00 |
| 0.90 | 1.00 | 0.11 | 0.97 | 1.00 | 0.98 | 1.00 | 0.90 | 0.96 |
|      |      | 0.11 | 0.97 | 1.00 | 0.99 | 1.00 | 1.00 | 0.93 |
|      |      | 0.44 | 1.00 | 1.00 | 1.00 | 1.00 | 1.00 | 0.95 |
|      |      | 0.78 | 1.00 | 1.00 | 1.00 | 1.00 | 0.95 | 1.00 |
|      |      | 0.82 | 1.00 | 1.00 | 1.00 | 1.00 | 1.00 |      |
